# Supplementary material for: IgG+ Extracellular Vesicles Measure Therapeutic Response in Advanced Pancreatic Cancer
Source: MDPI journal article supplement (doi:10.3390/cells11182800), 2022-09-08
Supplement: s1 [file s1]

Supplementary Material

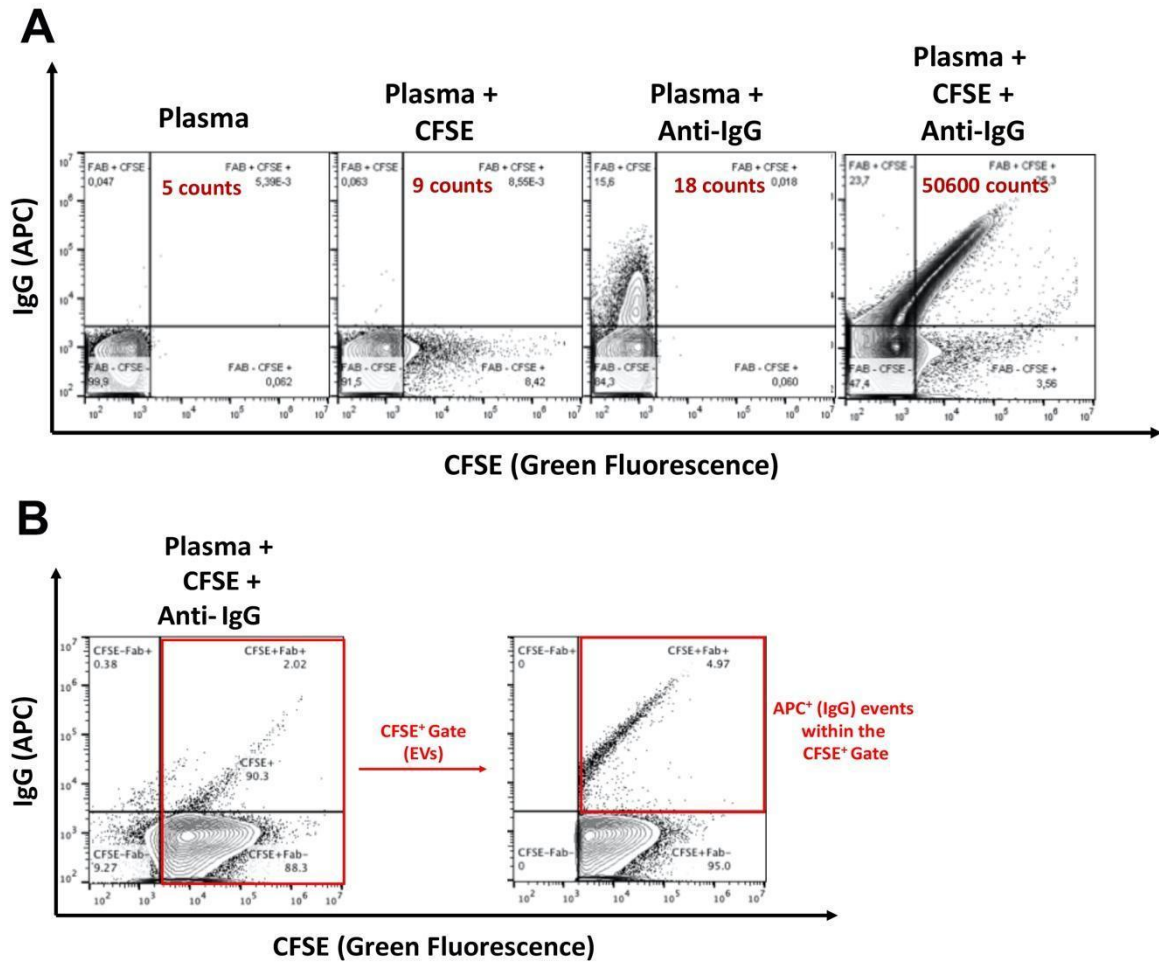

**Supplementary Figure S1.** Flow cytometry gating strategy. (A) Internal controls: representative plots of unstained plasma, plasma stained with CFSE, plasma stained with anti-IgG (FAB), and plasma stained with both CFSE and anti-IgG; the indicated counts correspond to the events within the upper right quadrant (CFSE<sup>+</sup>IgG<sup>+</sup>). (B) Characterization of EVs in plasma: representative plots of particles labeled with CFSE and anti-IgG (FAB) from plasma; the right panel indicates the IgG<sup>+</sup> (top right quadrant) and IgG<sup>-</sup> (lower right quadrant) events within CFSE<sup>+</sup> particles.

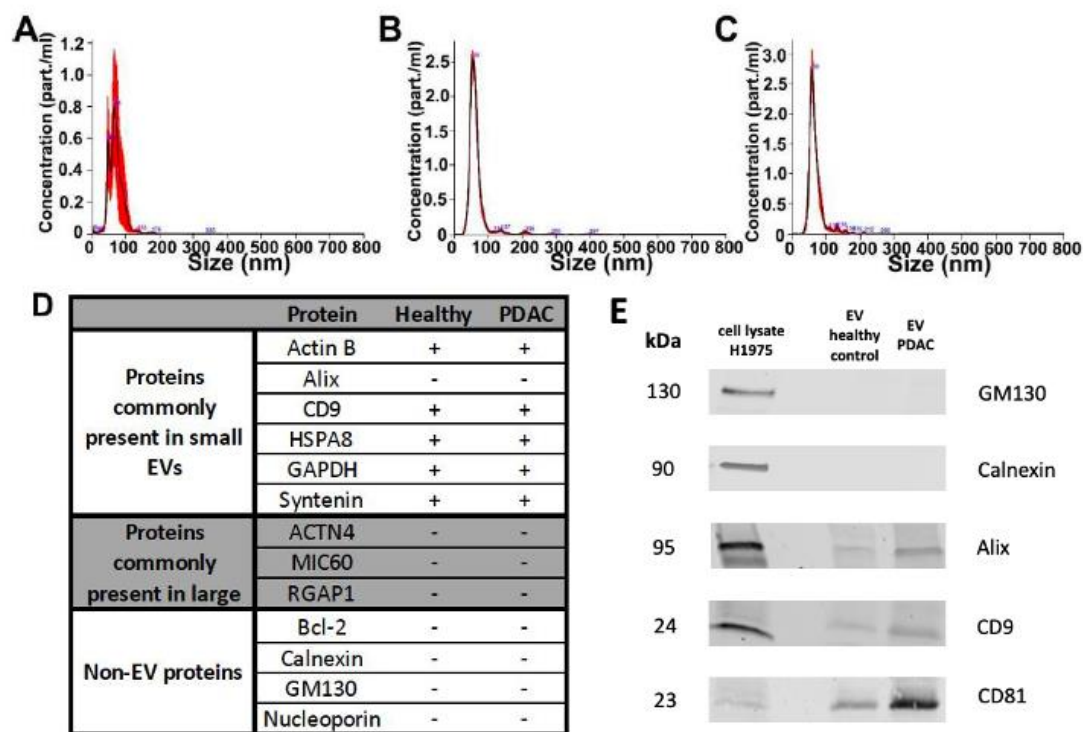

**Supplementary Figure S2.** Characterization of EVs. Representative size distribution histograms by Nanoparticle Tracking Analysis (NTA) of samples isolated from healthy controls (**A**) and from PDAC patients at diagnosis that did not respond (**B**) or that responded (**C**) to therapy. (**D**) Panel depicting the presence status of the indicated proteins in isolated EVs. (**E**) Representative Western blots of EV-markers CD9, CD81, Alix and non-EV markers GM130 and Calnexin for EV samples isolated from healthy control and PDAC plasma (H1975 cell lysate was used as a control).

**A**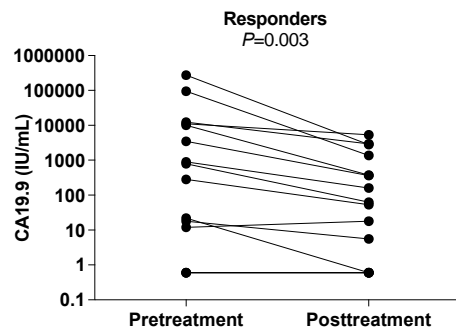**B**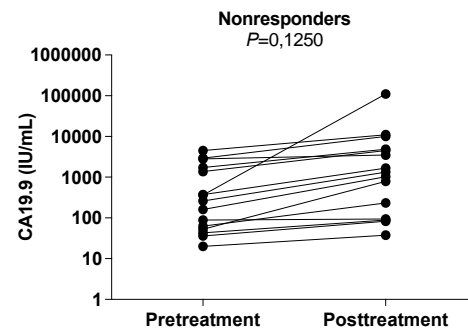**C**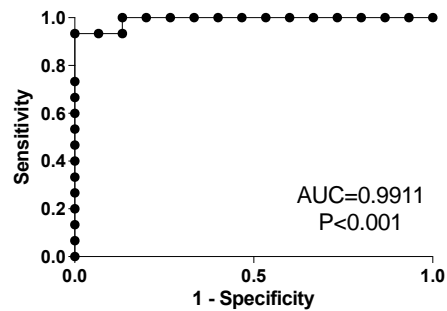

**Supplementary Figure S3.** CA19.9 levels in PDAC patients. Evolution of CA19.9 before and after treatment with chemotherapy in responders (**A**) and nonresponders (**B**) Depicted are the same patients and timepoints as in Figure 4 C and D. Wilcoxon test was used for statistical analysis. (**C**) ROC curve for the CA19.9 to discriminate response in patients with metastatic PDAC.

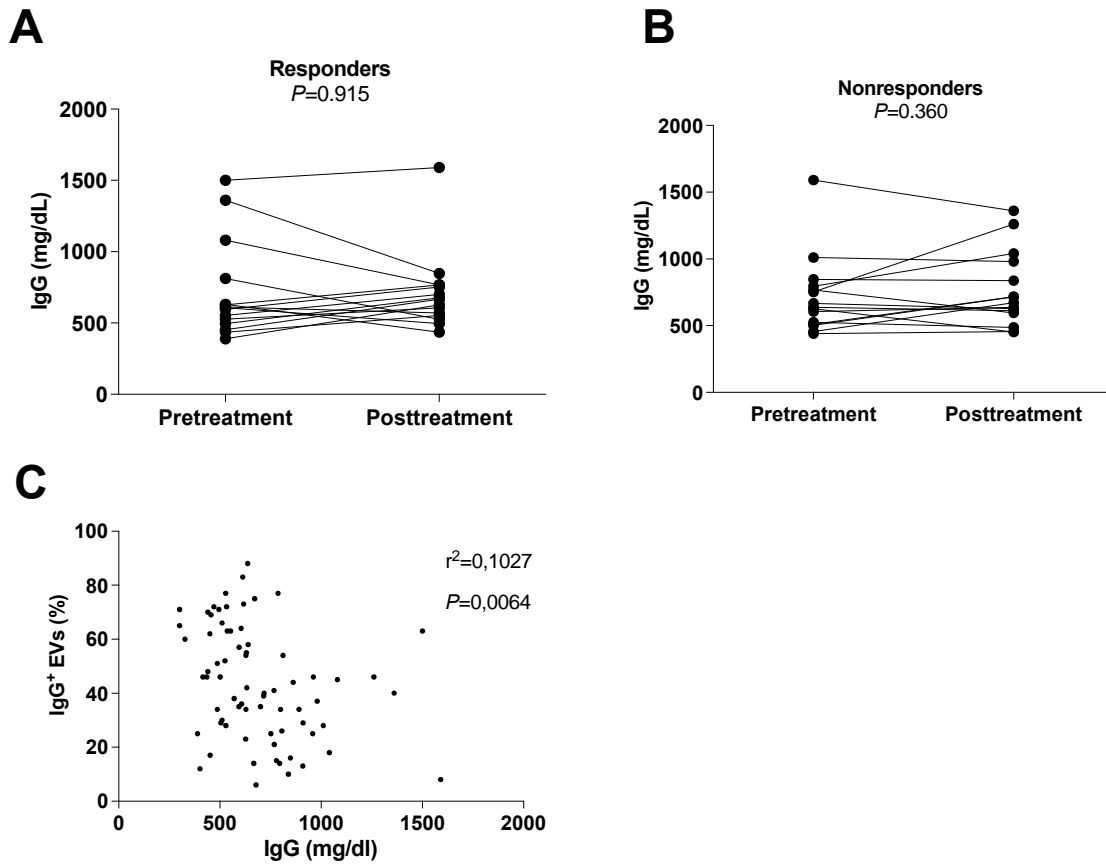

**Supplementary Figure S4.** Plasmatic IgG levels during treatment of PDAC patients. Comparison between plasmatic levels of IgG before and after treatment with chemotherapy in responders, by Wilcoxon test (**A**) and nonresponders, by t-test (**B**) Depicted are the same patients and timepoints as in Figure 4 C and D. There were no significant differences in both groups. (**C**) Correlation of the same time points of plasmatic IgG (mg/dL) vs percentage of IgG<sup>+</sup> EVs. Statistical analysis was performed by simple linear regression.

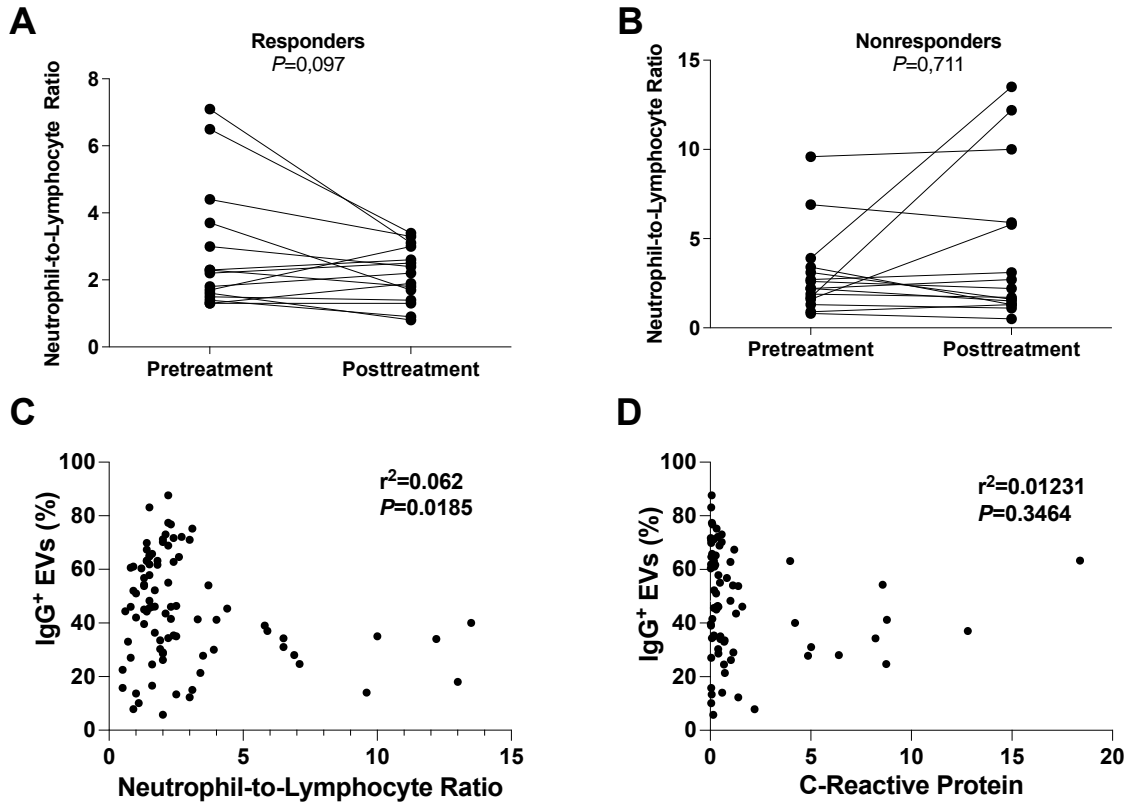

**Supplementary Figure S5.** Assessment of the inflammatory status of PDAC patients. Evolution of the neutrophil/lymphocyte ratio (NLR) between timepoints pre and post treatment with chemotherapy in responders, by t-test (**A**) and nonresponders, by Wilcoxon test (**B**). Depicted are the same patients and timepoints as in Figure 4 C and D. There were no significant differences in both groups. Correlation of the same time points of IgG<sup>+</sup> EVs vs NLR (**C**) and vs C-Reactive Protein (CRP) (**D**) Statistical analysis was performed by simple linear regression.

**Supplementary Table S1 – List of primary and secondary antibodies used for Western blotting**

| Primary Antibodies               |                          |                  |                        |
|----------------------------------|--------------------------|------------------|------------------------|
| Antibody                         | Manufacturer             | Catalog no       | Dilution/concentration |
| CD81                             | Santa Cruz Biotechnology | sc-166029        | 1:50                   |
| CD9                              | Cell Signaling           | #13174           | 1:1000                 |
| Alix                             | Sigma Aldrich            | SAB4200476-200UL | 1.25 ug/mL             |
| Calnexin                         | Abcam                    | ab22595          | 1:2000                 |
| GM130                            | Abcam                    | ab52649          | 1:1000                 |
| Secondary Antibodies             |                          |                  |                        |
| Antibody                         | Manufacturer             | Catalog no       | Dilution               |
| Goat anti-rabbit IgG IRDye 800CW | LI-COR Biosciences       | 926-32211        | 1:5000                 |
| Goat anti-mouse IgG IRDye 800CW  | LI-COR Biosciences       | 926-32210        | 1:5000                 |

**Supplementary Table S2 – Cytometer configuration and laser power**

| Channel number | Short Channel Name | Full Channel Name         | Optical Filter Name | Laser Wavelength | Laser Power | PMT Voltage |
|----------------|--------------------|---------------------------|---------------------|------------------|-------------|-------------|
| Ch1            | 405-SALS           | Small Angle Light Scatter |                     | 405 nm           | 200 mW      | 400 V       |
| Ch2            | 405-LALS           | Large Angle Light Scatter |                     | 405 nm           | 200 mW      | 400 V       |
| Ch3            | 405-Gm             | Green Fluorescence        | BP-525/50           | 405 nm           | 200 mW      | 500 V       |
| Ch4            | 405-Org            | Orange Fluorescence       | LWP-590/35          | 405 nm           | 200 mW      | 500 V       |
| Ch5            | APC                | Red Fluorescence          | BP-676/36           | 638 nm           | 150 mW      | 550 V       |
| Ch6            | CFSE               | Green Fluorescence        | BP-525/50           | 488 nm           | 200 mW      | 525 V       |
| Ch7            | PE                 | Orange Fluorescence       | BP-575/30           | 488 nm           | 200 mW      | 500 V       |
| Ch8            | 488-Red            | Red Fluorescence          | BP-676/36           | 488 nm           | 200 mW      | 500 V       |

|     |          |                       |         |        |        |       |
|-----|----------|-----------------------|---------|--------|--------|-------|
| Ch9 | 488-DRed | Deep Red Fluorescence | LWP-740 | 488 nm | 200 mW | 500 V |
|-----|----------|-----------------------|---------|--------|--------|-------|

**Supplementary Table S3 – EV proteins regulated in patients with PDAC (vs. healthy controls)**

| Protein IDs                                | Gene names | Mean Healthy Controls | Mean PDAC  | logFC    | P.Value  |
|--------------------------------------------|------------|-----------------------|------------|----------|----------|
| P02675                                     | FGB        | 30,80916              | 32,63287   | 1,823711 | 1,7E-15  |
| P01591                                     | IGJ        | 31,04684              | 29,11787   | -1,92898 | 1,71E-12 |
| Q16610;Q16610-4;Q16610-2;Q16610-3          | ECM1       | 22,3285               | 24,74706   | 2,418563 | 5,83E-10 |
| P01871;P01871-2                            | IGHM       | 32,80839              | 31,13976   | -1,66863 | 3,11E-09 |
| P02679                                     | FGG        | 31,73688              | 32,79369   | 1,056811 | 5,31E-09 |
| P07360                                     | C8G        | 24,25857              | 25,95475   | 1,69618  | 1,28E-08 |
| Q9Y2I7                                     | PIKFYVE    | 8,610452              | 18,488365  | 9,877913 | 5,23E-08 |
| P08603;P08603-2                            | CFH        | 25,70408              | 26,9523    | 1,24822  | 8,16E-08 |
| P02751;P02751-8;P02751-3;P02751-15         | FN1        | 29,12809              | 30,96719   | 1,839091 | 8,28E-08 |
| O75636;O75636-2                            | FCN3       | 27,6463               | 30,25062   | 2,604322 | 1,07E-07 |
| P12111-4;P12111-2;P12111;P12111-3;P12111-5 | COL6A3     | 0,7664544             | 13,3798081 | 12,61335 | 1,14E-07 |
| Q9C0K7-3;Q9C0K7-2;Q9C0K7                   | STRADB     | 6,21537               | 19,08732   | 12,87195 | 1,86E-07 |
| P81605;P81605-2                            | DCD        | 15,62981              | 1,59704    | -14,0328 | 2,21E-07 |
| P00488;P16452-3;P16452;P16452-2            | F13A1      | 23,53023              | 25,2402    | 1,709968 | 2,47E-07 |
| A0A0B4J1V6                                 | IGHV3-73   | 24,99557              | 23,20821   | -1,78736 | 3,07E-07 |
| P09871                                     | C1S        | 22,88309              | 23,99478   | 1,111685 | 3,33E-07 |
| P02679-2                                   | FGG        | 13,1101               | 21,87546   | 8,765356 | 6,49E-07 |
| O43866                                     | CD5L       | 29,42484              | 27,78712   | -1,63772 | 8,76E-07 |
| Q08830                                     | FGL1       | 13,01631              | 21,4914    | 8,475092 | 9,83E-07 |
| P0DOY3                                     |            | 32,86217              | 31,9975    | -0,86467 | 1,03E-06 |
| P01709                                     |            | 27,85825              | 25,97132   | -1,88692 | 1,71E-06 |
| A0A0B4J1V0                                 | IGHV3-15   | 25,76245              | 24,63909   | -1,12337 | 2,45E-06 |
| P00451;P00451-2                            | F8         | 18,60007              | 21,25979   | 2,659721 | 3,93E-06 |
| P07358                                     | C8B        | 23,55035              | 24,45246   | 0,902108 | 5,32E-06 |
| P01011;P01011-2                            | SERPINA3   | 24,59445              | 25,81344   | 1,218999 | 1E-05    |
| P01042                                     | KNG1       | 22,39664              | 23,79217   | 1,395532 | 1,05E-05 |
| O14791;O14791-2;O14791-3                   | APOL1      | 26,07611              | 24,37361   | -1,7025  | 1,76E-05 |
| P04275;P04275-2                            | VWF        | 27,3174               | 29,24253   | 1,925138 | 1,9E-05  |
| P04196                                     | HRG        | 24,01787              | 25,45884   | 1,440968 | 2,94E-05 |
| P12109                                     | COL6A1     | 5,053083              | 15,624026  | 10,57094 | 3,88E-05 |
| P01780                                     |            | 29,81985              | 28,87501   | -0,94484 | 6,6E-05  |
| A0A087WW87;P01614                          | IGKV2-40   | 28,98482              | 28,20821   | -0,77661 | 9,96E-05 |
| P06312                                     | IGKV4-1    | 27,12003              | 26,34662   | -0,77341 | 0,00014  |
| P04211                                     |            | 23,414648             | 9,843152   | -13,5715 | 0,000152 |
| Q08380                                     | LGALS3BP   | 27,12358              | 25,96748   | -1,1561  | 0,000168 |
| P13671                                     | C6         | 22,07315              | 23,13764   | 1,064495 | 0,000171 |

|                                            |                                 |           |           |          |          |
|--------------------------------------------|---------------------------------|-----------|-----------|----------|----------|
| P10909-4;P10909;P10909-5;P10909-2;P10909-3 | CLU                             | 26,44996  | 27,21772  | 0,767758 | 0,000203 |
| A0M8Q6                                     | IGLC7                           | 16,343175 | 4,559787  | -11,7834 | 0,000234 |
| P02792                                     | FTL                             | 23,44187  | 26,07389  | 2,632021 | 0,000249 |
| Q4LDE5;Q4LDE5-4;Q4LDE5-3;Q4LDE5-2          | SVEP1                           | 4,153104  | 14,13788  | 9,984777 | 0,000271 |
| Q9HCU4                                     | CELSR2                          | 7,209845  | 18,779373 | 11,56953 | 0,000376 |
| Q14520-2;Q14520                            | HABP2                           | 9,420802  | 18,345494 | 8,924692 | 0,000449 |
| Q9Y6R7                                     | FCGBP                           | 22,3186   | 20,91387  | -1,40473 | 0,000479 |
| Q9NZT1                                     | CALML5                          | 15,381387 | 4,785034  | -10,5964 | 0,000542 |
| Q08554-2;Q08554                            | DSC1                            | 12,67823  | 3,226449  | -9,45178 | 0,000723 |
| Q96IY4;Q96IY4-2                            | CPB2                            | 9,124999  | 18,288738 | 9,163739 | 0,000772 |
| P01009;P01009-2;P01009-3;P20848            | SERPINA1                        | 27,45175  | 28,67493  | 1,223177 | 0,000823 |
| A0A0C4DH68                                 | IGKV2-24                        | 27,98671  | 27,01923  | -0,96748 | 0,00084  |
| P02743                                     | APCS                            | 26,49926  | 27,12377  | 0,624511 | 0,000918 |
| O43166                                     | SIPA1L1                         | 3,611292  | 0         | -3,61129 | 0,001353 |
| P01859                                     | IGHG2                           | 28,50515  | 29,53058  | 1,025437 | 0,001748 |
| Q01469                                     | FABP5                           | 13,333104 | 3,547731  | -9,78537 | 0,001785 |
| Q562R1                                     | ACTBL2                          | 4,454414  | 0         | -4,45441 | 0,001804 |
| A0A0A0MRZ9                                 | IGLV5-52                        | 4,580166  | 0         | -4,58017 | 0,001869 |
| P01860                                     | IGHG3                           | 28,57457  | 29,43901  | 0,86444  | 0,002166 |
| P02763                                     | ORM1                            | 23,88044  | 25,18618  | 1,30574  | 0,002263 |
| P29622                                     | SERPINA4                        | 15,58681  | 20,29616  | 4,709354 | 0,002959 |
| O00189                                     | AP4M1                           | 8,074653  | 16,858605 | 8,783952 | 0,003489 |
| P07357                                     | C8A                             | 24,73622  | 25,25004  | 0,513816 | 0,004064 |
| P01594;P01593                              |                                 | 23,88627  | 24,80415  | 0,91788  | 0,004506 |
| Q15582                                     | TGFBI                           | 5,345572  | 13,679386 | 8,333814 | 0,005173 |
| P98160                                     | HSPG2                           | 8,859966  | 15,662051 | 6,802085 | 0,005736 |
| A2NJV5;A0A075B6S2;A0A0A0MRZ7               | IGKV<br>A18;IGKV2D-29;IGKV2D-26 | 6,2640694 | 0,5281823 | -5,73589 | 0,006043 |
| P00748                                     | F12                             | 21,33945  | 22,1381   | 0,798658 | 0,006085 |
| P22792                                     | CPN2                            | 22,25886  | 22,8205   | 0,561642 | 0,006173 |
| P11021                                     | HSPA5                           | 3,720965  | 11,713255 | 7,992289 | 0,006826 |
| P01876                                     | IGHA1                           | 31,13867  | 30,24995  | -0,88872 | 0,006911 |
| Q92496-2;Q92496;Q92496-3                   | CFHR4                           | 2,42436   | 11,03821  | 8,613846 | 0,007766 |
| A0A075B6I1                                 | IGLV4-60                        | 13,87167  | 5,185394  | -8,68628 | 0,010051 |
| P01703                                     |                                 | 17,37782  | 23,23569  | 5,857872 | 0,010649 |
| P18428                                     | LBP                             | 11,47416  | 18,31519  | 6,841032 | 0,011323 |
| Q8NI99                                     | ANGPTL6                         | 11,526017 | 4,144387  | -7,38163 | 0,011906 |
| A0A0B4J1U7                                 | IGHV6-1                         | 22,59996  | 26,62302  | 4,023052 | 0,012004 |
| Q9BXR6                                     | CFHR5                           | 5,800607  | 13,338935 | 7,538328 | 0,014154 |
| P02751-10;P02751-13                        | FN1                             | 9,087818  | 16,69571  | 7,607892 | 0,01441  |
| P02790                                     | HPX                             | 25,28332  | 26,11439  | 0,831076 | 0,014443 |
| P21980-2;P21980;P21980-3                   | TGM2                            | 4,2720915 | 0,4457934 | -3,8263  | 0,014565 |
| P02746                                     | C1QB                            | 27,56949  | 28,01983  | 0,450336 | 0,019773 |
| P02760                                     | AMBP                            | 24,33717  | 24,93431  | 0,597142 | 0,020355 |
| P01701                                     |                                 | 27,48918  | 26,60877  | -0,88041 | 0,021183 |
| P01766                                     |                                 | 24,45966  | 17,99343  | -6,46623 | 0,023374 |
| P01019                                     | AGT                             | 23,4802   | 22,67968  | -0,80053 | 0,023513 |
| A0A0G2JS06                                 |                                 | 25,3019   | 19,47542  | -5,82649 | 0,024552 |
| P01704                                     |                                 | 19,9328   | 25,27153  | 5,338733 | 0,024827 |
| Q5T749                                     | KPRP                            | 4,4687764 | 0,5660902 | -3,90269 | 0,024872 |
| O00187;O00187-2                            | MASP2                           | 19,93343  | 20,97891  | 1,04548  | 0,026433 |
| Q03591                                     | CFHR1                           | 23,1884   | 23,76836  | 0,579961 | 0,02717  |
| P11217-2;P11217;P06737-2;P11216;P06737     | PYGM                            | 4,6574862 | 0,6082011 | -4,04929 | 0,027593 |



|                                            |                         |           |           |          |          |
|--------------------------------------------|-------------------------|-----------|-----------|----------|----------|
| P07225                                     | PROS1                   | 25,57112  | 25,99843  | 0,427312 | 0,029207 |
| Q12805-5;Q12805-2;Q12805-4;Q12805-3;Q12805 | EFEMP1                  | 2,296374  | 8,973493  | 6,67712  | 0,029245 |
| A0A075B6H9                                 | IGLV4-69                | 25,56016  | 20,4878   | -5,07236 | 0,029928 |
| P01715                                     |                         | 19,30839  | 11,32053  | -7,98786 | 0,031146 |
| Q02413;Q02413-2                            | DSG1                    | 3,6552677 | 0,5459463 | -3,10932 | 0,036858 |
| Q66K66                                     | TMEM198                 | 20,92864  | 23,50407  | 2,575437 | 0,038233 |
| P08473                                     | MME                     | 15,310028 | 8,574814  | -6,73521 | 0,038239 |
| P68133;P68032;P63267;P62736;P63267-2       | ACTA1;ACTC1;ACTG2;ACTA2 | 7,430236  | 13,875415 | 6,44518  | 0,040955 |
| A0A0C4DH24                                 | IGKV6-21                | 24,16357  | 18,66946  | -5,4941  | 0,041297 |
| P01817                                     |                         | 12,696209 | 5,607219  | -7,08899 | 0,042827 |
| P15144                                     | ANPEP                   | 20,31834  | 14,37981  | -5,93853 | 0,045148 |
| P62987;P62979;P0CG47;P0CG48                | UBA52;RPS27A;UBB;UBC    | 19,56519  | 12,92859  | -6,63661 | 0,046162 |
| A0A075B6S6                                 | IGKV2D-30               | 12,474057 | 5,802547  | -6,67151 | 0,048532 |
| P08519;Q16609                              | LPA                     | 5,945479  | 12,500058 | 6,554579 | 0,049001 |

**Supplementary Table S4 – EV proteins regulated in nonresponders PDAC patients (vs. responders)**

| Protein IDs                  | Gene names           | Mean Non Responders | Mean Responders | logFC    | P.Value  |
|------------------------------|----------------------|---------------------|-----------------|----------|----------|
| A0A0C4DH72;A0A0C4DH73;P01611 | IGKV1-6              | 15,060969           | 3,574371        | -11,4866 | 0,000489 |
| P04432;P01597                |                      | 14,692537           | 3,558026        | -11,1345 | 0,000562 |
| P01817                       |                      | 10,90292            | 0,00000         | -10,9029 | 0,000293 |
| A0A0C4DH68                   | IGKV2-24             | 26,58469            | 27,47934        | 0,894657 | 0,000201 |
| P02746                       | C1QB                 | 27,77124            | 28,28304        | 0,511799 | 0,001447 |
| P01714                       |                      | 25,10489            | 26,84546        | 1,740563 | 0,00226  |
| P15814;P15814-2              | IGLL1                | 8,060513            | 0               | -8,06051 | 0,002832 |
| Q08554-2;Q08554              | DSC1                 | 0                   | 6,642689        | 6,642689 | 0,004575 |
| A0A075B6S5;A0A0C4DH69        | IGKV1-27             | 15,14843            | 5,662179        | -9,48625 | 0,004863 |
| P62987;P62979;P0CG47;P0CG48  | UBA52;RPS27A;UBB;UBC | 8,622959            | 17,487488       | 8,864529 | 0,007196 |
| P15144                       | ANPEP                | 10,49458            | 18,49358        | 7,998998 | 0,009811 |
| A0A0B4J1V0                   | IGHV3-15             | 24,3923             | 24,90039        | 0,508095 | 0,009961 |
| Q9NZP8                       | C1RL                 | 9,544               | 2,343031        | -7,20097 | 0,010317 |
| A0A0A0MT36                   | IGKV6D-21            | 10,839119           | 2,553621        | -8,2855  | 0,013266 |
| P07357                       | C8A                  | 25,08541            | 25,42435        | 0,338941 | 0,013604 |

|                                            |                          |           |          |          |          |
|--------------------------------------------|--------------------------|-----------|----------|----------|----------|
| Q13103                                     | SPP2                     | 9,603383  | 2,31008  | -7,2933  | 0,014323 |
| Q9BXR6                                     | CFHR5                    | 16,619122 | 9.865795 | -6,75333 | 0,017651 |
| Q8TCG1-2;Q8TCG1                            | KIAA1524                 | 8,173923  | 1,876418 | -6,2975  | 0,020795 |
| P08637;O75015                              | FCGR3A                   | 11,79168  | 18,71712 | 6,925439 | 0,021632 |
| Q9BWP8-8;Q9BWP8-7;Q9BWP8-6;Q9BWP8-5        | COLEC11                  | 12,04857  | 4.62706  | -7,42151 | 0,023107 |
| P01857                                     | IGHG1                    | 32,56523  | 31,99845 | -0,56677 | 0,02629  |
| P03952;P20718                              | KLKB1                    | 23,64847  | 23,94836 | 0,299895 | 0,026916 |
| P13164;Q01629;Q01628                       | IFITM1;IFITM2;IFI<br>TM3 | 0         | 5,501942 | 5,501942 | 0,027497 |
| P05106-2;P05106-3;P05106                   | ITGB3                    | 0         | 3,959515 | 3,959515 | 0,027508 |
| P02745                                     | C1QA                     | 27,34568  | 27,7409  | 0,395215 | 0,02757  |
| A0A0C4DH43;P01814                          |                          | 23,72722  | 17,35704 | -6,37018 | 0,028112 |
| A0A0A0MS15                                 | IGHV3-49                 | 23,7816   | 22,93867 | -0,84293 | 0,028814 |
| P07225                                     | PROS1                    | 25,81825  | 26,18921 | 0,370953 | 0,028895 |
| P04278-4;P04278-2;P04278-3;P04278;P04278-5 | SHBG                     | 13,2751   | 6.543573 | -6,73153 | 0,029683 |
| P08670;P17661;Q16352;P07197-2              | VIM                      | 0         | 4,58408  | 4,58408  | 0,029827 |
| P02747                                     | C1QC                     | 28,01889  | 28,39234 | 0,373451 | 0,030901 |
| P23083                                     |                          | 25,56806  | 26,25761 | 0,689546 | 0,031442 |
| P28074-3;P28074                            | PSMB5                    | 8,442728  | 2,336585 | -6,10614 | 0,03599  |
| P04430                                     |                          | 21,55277  | 16,68508 | -4,8677  | 0,036212 |
| A0A087WSX0                                 | IGLV5-45                 | 5,619149  | 0        | -5,61915 | 0,037874 |
| P01699                                     |                          | 4,512501  | 0        | -4,5125  | 0,037909 |
| P27169                                     | PON1                     | 23,04364  | 23,63591 | 0,592268 | 0,040998 |
| A0A0C4DH29                                 | IGHV1-3                  | 21,04053  | 15,33251 | -5,70801 | 0,042131 |
| A0A075B6I0                                 | IGLV8-61                 | 25,2758   | 19,73274 | -5,54307 | 0,04525  |
| A0A075B6Q5                                 | IGHV3-64                 | 18,17808  | 11,41315 | -6,76493 | 0,047306 |
| Q01469                                     | FABP5                    | 1,009046  | 6,235751 | 5,226705 | 0,04767  |
| P01861                                     | IGHG4                    | 27,21168  | 26,56055 | -0,65113 | 0,048619 |
| P00739;P00739-2                            | HPR                      | 26,29785  | 25,7406  | -0,55725 | 0,049185 |
